# Supplementary material for: Application of Whole Genome Sequencing to Understand Diversity and Presence of Genes Associated with Sanitizer Tolerance in Listeria monocytogenes from Produce Handling Sources
Source: MDPI journal article supplement (doi:10.3390/foods10102454), 2021-10-14
Supplement: s1 [file s1]

## Supplementary Materials

**Table S1.** Assembly statistics resulting from SPAdes *de novo* assemblies.

| Strain ID | Species                 | Facility | Contigs No. | Length (bp) | N50     |
|-----------|-------------------------|----------|-------------|-------------|---------|
| WRLP354   | <i>L. monocytogenes</i> | 2        | 38          | 3066783     | 296097  |
| WRLP360   | <i>L. monocytogenes</i> | 4        | 24          | 2881261     | 1457222 |
| WRLP367   | <i>L. monocytogenes</i> | 6        | 19          | 2889889     | 684358  |
| WRLP370   | <i>L. monocytogenes</i> | 6        | 25          | 2979345     | 541396  |
| WRLP377   | <i>L. monocytogenes</i> | 2        | 38          | 3038585     | 330851  |
| WRLP378   | <i>L. monocytogenes</i> | 2        | 44          | 3037562     | 330851  |
| WRLP380   | <i>L. monocytogenes</i> | 2        | 54          | 3103663     | 225002  |
| WRLP382   | <i>L. monocytogenes</i> | 2        | 43          | 3037571     | 330851  |
| WRLP386   | <i>L. monocytogenes</i> | 2        | 58          | 3103288     | 272216  |
| WRLP394   | <i>L. monocytogenes</i> | 1        | 38          | 2927271     | 476657  |
| WRLP408   | <i>L. monocytogenes</i> | 3        | 48          | 3082589     | 399511  |
| WRLP409   | <i>L. monocytogenes</i> | 3        | 48          | 3082292     | 399511  |
| WRLP410   | <i>L. monocytogenes</i> | 6        | 33          | 2978884     | 524000  |
| WRLP417   | <i>L. monocytogenes</i> | 6        | 51          | 2926135     | 541208  |
| WRLP416   | <i>L. monocytogenes</i> | 6        | 53          | 2925733     | 541208  |
| WRLP422   | <i>L. monocytogenes</i> | 1        | 30          | 2892522     | 498434  |
| WRLP434   | <i>L. monocytogenes</i> | 1        | 17          | 2838182     | 1457220 |
| WRLP440   | <i>L. monocytogenes</i> | 1        | 32          | 2892224     | 498279  |
| WRLP443   | <i>L. monocytogenes</i> | 1        | 32          | 2892414     | 498434  |
| WRLP446   | <i>L. monocytogenes</i> | 1        | 32          | 2892350     | 498434  |
| WRLP455   | <i>L. monocytogenes</i> | 1        | 36          | 2927486     | 476657  |
| WRLP459   | <i>L. monocytogenes</i> | 1        | 39          | 2927219     | 475201  |
| WRLP463   | <i>L. monocytogenes</i> | 1        | 39          | 2927400     | 476657  |
| WRLP466   | <i>L. monocytogenes</i> | 1        | 34          | 2927379     | 476657  |
| WRLP468   | <i>L. monocytogenes</i> | 1        | 36          | 2927486     | 476657  |
| WRLP469   | <i>L. monocytogenes</i> | 1        | 34          | 2927373     | 476657  |
| WRLP472   | <i>L. monocytogenes</i> | 1        | 22          | 2895033     | 1495945 |
| WRLP477   | <i>L. monocytogenes</i> | 1        | 25          | 2894404     | 353377  |
| WRLP483   | <i>L. monocytogenes</i> | 1        | 36          | 2930302     | 476657  |
| WRLP486   | <i>L. monocytogenes</i> | 1        | 37          | 2927399     | 476657  |
| WRLP490   | <i>L. monocytogenes</i> | 1        | 21          | 2894954     | 449882  |
| WRLP491   | <i>L. monocytogenes</i> | 1        | 25          | 2894404     | 353377  |
| WRLP494   | <i>L. monocytogenes</i> | 1        | 37          | 2927399     | 476657  |
| WRLP496   | <i>L. monocytogenes</i> | 1        | 36          | 2927378     | 476657  |
| WRLP498   | <i>L. monocytogenes</i> | 1        | 22          | 2894543     | 449882  |
| WRLP499   | <i>L. monocytogenes</i> | 1        | 36          | 2927373     | 476657  |
| WRLP502   | <i>L. monocytogenes</i> | 1        | 40          | 2927200     | 476657  |
| WRLP508   | <i>L. monocytogenes</i> | 1        | 22          | 2894549     | 449882  |

---

| Strain ID | Species                 | Facility | Contigs No. | Length (bp) | N50    |
|-----------|-------------------------|----------|-------------|-------------|--------|
| WRLP512   | <i>L. monocytogenes</i> | 1        | 36          | 2927373     | 476657 |
| WRLP517   | <i>L. monocytogenes</i> | 1        | 36          | 2927379     | 476657 |
| WRLP519   | <i>L. monocytogenes</i> | 1        | 39          | 2927364     | 476657 |
| WRLP520   | <i>L. monocytogenes</i> | 1        | 39          | 2927393     | 476657 |
| WRLP522   | <i>L. monocytogenes</i> | 1        | 22          | 2894549     | 449882 |
| WRLP521   | <i>L. monocytogenes</i> | 1        | 35          | 2927534     | 476657 |
| WRLP525   | <i>L. monocytogenes</i> | 1        | 22          | 2894549     | 449882 |
| WRLP527   | <i>L. monocytogenes</i> | 1        | 39          | 2927399     | 476657 |
| WRLP530   | <i>L. monocytogenes</i> | 1        | 27          | 2883618     | 509939 |
| WRLP533   | <i>L. monocytogenes</i> | 1        | 31          | 2883795     | 509804 |

---

**Table S2.** NCBI Accession numbers used to screen for antimicrobials tolerance determinants and virulence genes.

| <b>Gene/ gene region</b>   | <b>Accession no.</b> |
|----------------------------|----------------------|
| <i>tetR, tnpABC</i>        | HF565366.1           |
| <i>qacH</i>                | HG329628             |
| <i>qacC</i>                | QXKR01000002.1       |
| <i>emrE</i>                | CP001602.2           |
| <i>emrC</i>                | LT732640.1           |
| <i>bcrABC</i>              | JX023276             |
| <i>cadA1</i>               | L28104               |
| <i>cadA2</i>               | AADR01000058         |
| LIPI-1, SSI-1, <i>inlA</i> | NC_003210            |
| LIPI-3                     | NZ_LABXLV000000000.1 |
| LIPI-4                     | FM242711.1           |

**Table S3.** GoTerm analysis of select CC155 accessory genes annotated as DNA binding, transcriptional regulator or membrane component.

| SeqName    | Description                                 | Length | #Hits | e-Value   | Similarity mean | #GO | GO IDs                                                          | GO Names                                                                                                                     |
|------------|---------------------------------------------|--------|-------|-----------|-----------------|-----|-----------------------------------------------------------------|------------------------------------------------------------------------------------------------------------------------------|
| group_1835 | TetR/AcrR family transcriptional regulator  | 594    | 20    | 3.88E-143 | 99.75           | 1   | F:GO:0003677                                                    | F:DNA binding                                                                                                                |
| group_1029 | sigma-70 family RNA polymerase sigma factor | 405    | 20    | 1.23E-89  | 99.22           | 3   | P:GO:2000142;<br>F:GO:0003677;<br>F:GO:0016987                  | P:regulation of DNA-templated transcription, initiation; F:DNA binding; F:sigma factor activity                              |
| mtrR       | TetR/AcrR family transcriptional regulator  | 528    | 20    | 3.44E-125 | 97.4            | 1   | F:GO:0003677                                                    | F:DNA binding                                                                                                                |
| xerD_2     | site-specific integrase                     | 1164   | 20    | 0         | 99.94           | 3   | P:GO:0006310;<br>P:GO:0015074;<br>F:GO:0003677                  | P:DNA recombination; P:DNA integration; F:DNA binding                                                                        |
| group_2252 | transposase                                 | 282    | 20    | 9.79E-59  | 92.57           | 4   | P:GO:0006313;<br>P:GO:0015074;<br>F:GO:0003677;<br>F:GO:0004803 | P:transposition, DNA-mediated; P:DNA integration; F:DNA binding; F:transposase activity                                      |
| group_2270 | recombinase family protein                  | 621    | 20    | 6.39E-147 | 98.82           | 4   | P:GO:0006310;<br>P:GO:0015074;<br>F:GO:0000150;<br>F:GO:0003677 | P:DNA recombination; P:DNA integration; F:DNA strand exchange activity; F:DNA binding                                        |
| mrr        | restriction endonuclease                    | 984    | 20    | 0         | 99.97           | 4   | P:GO:0009307;<br>P:GO:0090305;<br>F:GO:0003677;<br>F:GO:0004519 | P:DNA restriction-modification system; P:nucleic acid phosphodiester bond hydrolysis; F:DNA binding; F:endonuclease activity |
| group_1168 | XRE family transcriptional regulator        | 993    | 20    | 4.85E-179 | 98.19           | 2   | F:GO:0003677;<br>C:GO:0016021                                   | F:DNA binding; C:integral component of membrane                                                                              |
| group_1510 | XRE family transcriptional regulator        | 264    | 20    | 5.39E-55  | 99.25           | 1   | F:GO:0003677                                                    | F:DNA binding                                                                                                                |
| group_306  | divergent PAP2 family protein               | 474    | 20    | 1.89E-108 | 99.97           | 1   | C:GO:0016021                                                    | C:integral component of membrane                                                                                             |
| sauU       | MFS transporter                             | 1206   | 20    | 0         | 99.79           | 4   | P:GO:0055085;<br>F:GO:0022857;<br>C:GO:0005886;<br>C:GO:0016021 | P:transmembrane transport; F:transmembrane transporter activity; C:plasma membrane; C:integral component of membrane         |
| group_676  | hypothetical protein M640_01320             | 651    | 20    | 3.32E-142 | 99.77           | 1   | C:GO:0016021                                                    | C:integral component of membrane                                                                                             |

| SeqName    | Description             | Length | #Hits | e-Value  | Similarity mean | #GO | GO IDs                                                          | GO Names                                                                                                                                       |
|------------|-------------------------|--------|-------|----------|-----------------|-----|-----------------------------------------------------------------|------------------------------------------------------------------------------------------------------------------------------------------------|
| group_532  | competence protein ComG | 318    | 20    | 9.40E-68 | 99.33           | 1   | C:GO:0016021                                                    | C:integral component of membrane                                                                                                               |
| group_1281 | sensor histidine kinase | 1740   | 20    | 0        | 99.94           | 4   | P:GO:0000160;<br>P:GO:0016310;<br>F:GO:0000155;<br>C:GO:0016021 | P:phosphorelay signal transduction system;<br>P:phosphorylation;<br>F:phosphorelay sensor kinase activity;<br>C:integral component of membrane |
| group_1466 | GAP family protein      | 258    | 20    | 2.84E-50 | 100             | 1   | C:GO:0016021                                                    | C:integral component of membrane                                                                                                               |

Figure S1. Pairwise SNP matrix.

| strain  | WRLP434 | WRLP416 | WRLP417 | WRLP367 | WRLP370 | WRLP410 | WRLP498 | WRLP490 | WRLP508 | WRLP491 | WRLP525 | WRLP472 | WRLP477 | strain  |
|---------|---------|---------|---------|---------|---------|---------|---------|---------|---------|---------|---------|---------|---------|---------|
| WRLP477 | 2313    | 21807   | 2168    | 2520    | 2282    | 21629   | 1       | 1       | 0       | 0       | 0       | 0       | 0       | WRLP477 |
| WRLP472 | 2314    | 21810   | 2168    | 2520    | 2281    | 21620   | 1       | 1       | 0       | 0       | 0       | 0       | 0       | WRLP472 |
| WRLP525 | 2314    | 21810   | 2168    | 2521    | 2282    | 21630   | 1       | 1       | 0       | 0       | 0       | 0       | 0       | WRLP525 |
| WRLP491 | 2311    | 21795   | 2167    | 2518    | 2280    | 21606   | 1       | 1       | 0       | 0       | 0       | 0       | 0       | WRLP491 |
| WRLP508 | 2314    | 21814   | 2169    | 2521    | 2283    | 21632   | 1       | 1       | 0       | 0       | 0       | 0       | 0       | WRLP508 |
| WRLP522 | 2313    | 21801   | 2168    | 2519    | 2281    | 21614   | 2       | 2       | 0       | 1       | 1       | 1       | 1       | WRLP522 |
| WRLP490 | 2313    | 21804   | 2167    | 2520    | 2281    | 21616   | 2       | 0       | 2       | 1       | 1       | 1       | 1       | WRLP490 |
| WRLP498 | 2314    | 21810   | 2168    | 2521    | 2283    | 21635   | 0       | 2       | 2       | 1       | 1       | 1       | 1       | WRLP498 |
| WRLP410 | 2281    | 20854   | 2079    | 415     | 313     | 0       | 2163    | 21616   | 21632   | 21606   | 21630   | 21620   | 2162    | WRLP410 |
| WRLP370 | 2367    | 21401   | 2142    | 280     | 0       | 313     | 2283    | 22815   | 22814   | 22808   | 22825   | 22815   | 2282    | WRLP370 |
| WRLP367 | 2515    | 22863   | 2281    | 0       | 280     | 415     | 2521    | 25200   | 25193   | 25187   | 25213   | 25203   | 2520    | WRLP367 |
| WRLP417 | 2124    | 245     | 0       | 2281    | 2142    | 20792   | 2168    | 21678   | 21681   | 21690   | 21684   | 21682   | 2168    | WRLP417 |
| WRLP416 | 2123    | 0       | 245     | 2286    | 2140    | 20854   | 2181    | 21804   | 21801   | 21814   | 21795   | 21810   | 2180    | WRLP416 |
| WRLP434 | 0       | 21238   | 2124    | 2515    | 2367    | 22815   | 2314    | 23136   | 23132   | 23145   | 23119   | 23142   | 2313    | WRLP434 |
| WRLP360 | 404     | 22452   | 2241    | 2639    | 2494    | 24182   | 2547    | 25473   | 25463   | 25482   | 25451   | 25476   | 2547    | WRLP360 |
| WRLP446 | 9454    | 94511   | 9426    | 9741    | 9542    | 94434   | 9564    | 95536   | 95576   | 95637   | 95504   | 95552   | 9560    | WRLP446 |
| WRLP443 | 1048    | 10469   | 1044    | 1075    | 1055    | 10449   | 1067    | 10668   | 10676   | 10678   | 10663   | 10668   | 1067    | WRLP443 |
| WRLP440 | 1094    | 10929   | 1091    | 1121    | 1100    | 10902   | 1117    | 11161   | 11161   | 11172   | 11156   | 11162   | 1116    | WRLP440 |
| WRLP422 | 1022    | 10203   | 1018    | 1049    | 1028    | 10190   | 1039    | 10389   | 10385   | 10398   | 10383   | 10388   | 1039    | WRLP422 |
| WRLP459 | 1033    | 10326   | 1030    | 1062    | 1041    | 10315   | 1052    | 10510   | 105106  | 10521   | 10508   | 10511   | 1051    | WRLP459 |
| WRLP512 | 1095    | 10944   | 1093    | 1123    | 1103    | 10928   | 1120    | 11192   | 111938  | 11202   | 11187   | 11192   | 1119    | WRLP512 |
| WRLP468 | 1156    | 11554   | 1154    | 1183    | 1161    | 11515   | 1186    | 11856   | 11858   | 11868   | 11853   | 11856   | 1186    | WRLP468 |
| WRLP466 | 1147    | 11481   | 1145    | 1176    | 1154    | 11441   | 1177    | 11767   | 117688  | 11779   | 11764   | 11767   | 1177    | WRLP466 |
| WRLP394 | 1141    | 11417   | 1139    | 1169    | 1148    | 11373   | 1169    | 11683   | 116857  | 11695   | 11680   | 11684   | 1168    | WRLP394 |
| WRLP469 | 1109    | 11081   | 1106    | 1135    | 1114    | 11049   | 1133    | 11324   | 113269  | 11336   | 11321   | 11325   | 1132    | WRLP469 |
| WRLP520 | 1081    | 10823   | 1079    | 1109    | 1088    | 10781   | 1105    | 11039   | 110398  | 11049   | 11034   | 11038   | 1104    | WRLP520 |
| WRLP519 | 1078    | 10780   | 1075    | 1106    | 1084    | 10746   | 1100    | 10996   | 109988  | 11008   | 10993   | 10997   | 1100    | WRLP519 |
| WRLP521 | 1099    | 10992   | 1097    | 1127    | 1106    | 10961   | 1123    | 11226   | 112270  | 11236   | 11221   | 11225   | 1122    | WRLP521 |
| WRLP517 | 1061    | 10620   | 1060    | 1090    | 1068    | 10593   | 1083    | 10822   | 108243  | 10833   | 10819   | 10822   | 1082    | WRLP517 |
| WRLP463 | 1062    | 10624   | 1060    | 1090    | 1069    | 10590   | 1082    | 10818   | 108181  | 10829   | 10815   | 10818   | 1082    | WRLP463 |
| WRLP455 | 1082    | 10807   | 1078    | 1108    | 1087    | 10783   | 1103    | 11024   | 110242  | 11035   | 11020   | 11024   | 1102    | WRLP455 |
| WRLP486 | 1032    | 10305   | 1029    | 1058    | 1038    | 10283   | 1050    | 10497   | 105005  | 10509   | 10493   | 10497   | 1050    | WRLP486 |
| WRLP494 | 1031    | 10298   | 1028    | 1057    | 1037    | 10274   | 1050    | 10492   | 104917  | 10501   | 10487   | 10492   | 1049    | WRLP494 |
| WRLP499 | 1032    | 10331   | 1030    | 1058    | 1037    | 10270   | 1050    | 10497   | 104987  | 10507   | 10493   | 10498   | 1050    | WRLP499 |
| WRLP527 | 1018    | 10194   | 1017    | 1047    | 1027    | 10168   | 1036    | 10351   | 103539  | 10363   | 10346   | 10353   | 1035    | WRLP527 |
| WRLP483 | 1003    | 10044   | 1003    | 1031    | 1010    | 10003   | 1020    | 10194   | 101963  | 10206   | 10190   | 10197   | 1019    | WRLP483 |
| WRLP496 | 9966    | 99725   | 9961    | 1026    | 1006    | 99581   | 1015    | 10138   | 101394  | 10148   | 10133   | 10140   | 1014    | WRLP496 |
| WRLP502 | 9486    | 94872   | 9466    | 9773    | 9563    | 94714   | 9602    | 95953   | 95919   | 96040   | 95898   | 95937   | 9594    | WRLP502 |
| WRLP377 | 9787    | 97621   | 9746    | 1006    | 9863    | 97624   | 9923    | 99154   | 99129   | 99217   | 99074   | 99140   | 9916    | WRLP377 |
| WRLP378 | 1018    | 10157   | 1013    | 1044    | 1024    | 10143   | 1037    | 10363   | 103630  | 10373   | 10357   | 10363   | 1036    | WRLP378 |
| WRLP382 | 1076    | 10737   | 1071    | 1102    | 1081    | 10717   | 1099    | 10980   | 109814  | 10992   | 10976   | 10982   | 1098    | WRLP382 |
| WRLP380 | 1074    | 10722   | 1069    | 1100    | 1080    | 10700   | 1098    | 10972   | 109733  | 10981   | 10968   | 10972   | 1097    | WRLP380 |
| WRLP354 | 1100    | 10990   | 1097    | 1126    | 1105    | 10946   | 1127    | 11266   | 112678  | 11277   | 11262   | 11265   | 1127    | WRLP354 |
| WRLP386 | 1169    | 11694   | 1167    | 1196    | 1174    | 11654   | 1203    | 12021   | 120236  | 12033   | 12017   | 12021   | 1202    | WRLP386 |
| WRLP530 | 1100    | 11002   | 1098    | 1127    | 1107    | 10961   | 1126    | 11253   | 112551  | 11265   | 11252   | 11255   | 1125    | WRLP530 |
| WRLP533 | 1051    | 10521   | 1049    | 1079    | 1058    | 10484   | 1073    | 10728   | 107285  | 10739   | 10722   | 10731   | 1073    | WRLP533 |
| WRLP408 | 1123    | 11219   | 1119    | 1150    | 1129    | 11190   | 1149    | 11481   | 114820  | 11492   | 11476   | 11480   | 1148    | WRLP408 |
| WRLP409 | 9604    | 95946   | 9567    | 9881    | 9676    | 95724   | 9695    | 96850   | 96859   | 96954   | 96833   | 96881   | 9689    | WRLP409 |

| Strain  | WRLP455 | WRLP463 | WRLP517 | WRLP521 | WRLP519 | WRLP520 | WRLP469 | WRLP394 | WRLP466 | WRLP468 | WRLP512 | WRLP459 | WRL422 | WRLP440 | WRLP443 | WRLP446 | WRLP360 |
|---------|---------|---------|---------|---------|---------|---------|---------|---------|---------|---------|---------|---------|--------|---------|---------|---------|---------|
| WRLP477 | 110282  | 108209  | 108258  | 112295  | 110027  | 110430  | 113295  | 116881  | 117715  | 118606  | 111948  | 105158  | 103918 | 111656  | 106732  | 95607   | 25473   |
| WRLP472 | 110267  | 108199  | 108246  | 112305  | 110022  | 110429  | 113273  | 116872  | 117706  | 118606  | 111949  | 105135  | 103895 | 111645  | 106706  | 95584   | 25477   |
| WRLP525 | 110247  | 108183  | 108223  | 112254  | 109978  | 110383  | 113250  | 116845  | 117678  | 118569  | 111927  | 105111  | 103885 | 111625  | 106685  | 95552   | 25476   |
| WRLP491 | 110204  | 108156  | 108191  | 112211  | 109932  | 110342  | 113210  | 116801  | 117640  | 118534  | 111872  | 105080  | 103832 | 111567  | 106639  | 95504   | 25451   |
| WRLP508 | 110356  | 108294  | 108331  | 112368  | 110080  | 110491  | 113363  | 116954  | 117793  | 118686  | 112028  | 105216  | 103981 | 111723  | 106782  | 95637   | 25482   |
| WRLP522 | 110242  | 108181  | 108243  | 112270  | 109988  | 110398  | 113269  | 116857  | 117688  | 118585  | 111938  | 105106  | 103885 | 111611  | 106676  | 95576   | 25463   |
| WRLP490 | 110248  | 108188  | 108222  | 112261  | 109967  | 110391  | 113248  | 116839  | 117678  | 118568  | 111922  | 105107  | 103893 | 111616  | 106688  | 95536   | 25473   |
| WRLP498 | 110353  | 108280  | 108331  | 112368  | 110084  | 110501  | 113363  | 116945  | 117785  | 118681  | 112032  | 105211  | 103982 | 111736  | 106787  | 95642   | 25476   |
| WRLP410 | 107830  | 105909  | 105930  | 109619  | 107464  | 107811  | 110494  | 113738  | 114418  | 115153  | 109282  | 103153  | 101905 | 109023  | 104491  | 94434   | 24182   |
| WRLP370 | 108755  | 106912  | 106867  | 110638  | 108472  | 108805  | 111491  | 114814  | 115475  | 116173  | 110325  | 104139  | 102869 | 110058  | 105545  | 95421   | 24948   |
| WRLP367 | 110837  | 109026  | 109037  | 112714  | 110611  | 110944  | 113587  | 116946  | 117603  | 118304  | 112375  | 106242  | 104960 | 112120  | 107578  | 97419   | 26392   |
| WRLP417 | 107850  | 106016  | 106069  | 109725  | 107552  | 107998  | 110655  | 113969  | 114578  | 115405  | 109328  | 103071  | 101848 | 109113  | 104473  | 94264   | 22413   |
| WRLP416 | 108074  | 106249  | 106202  | 109925  | 107800  | 108230  | 110815  | 114174  | 114814  | 115548  | 109440  | 103266  | 102032 | 109296  | 104691  | 94511   | 22452   |
| WRLP434 | 108223  | 106251  | 106194  | 109972  | 107842  | 108167  | 110942  | 114122  | 114751  | 115614  | 109542  | 103368  | 102245 | 109452  | 104878  | 94540   | 404     |
| WRLP360 | 109953  | 108027  | 107981  | 111697  | 109550  | 109988  | 112747  | 115960  | 116570  | 117385  | 111283  | 105116  | 104032 | 111193  | 106660  | 96279   | 0       |
| WRLP446 | 7861    | 7645    | 7719    | 7827    | 7709    | 7870    | 7927    | 8233    | 8228    | 8295    | 7744    | 6778    | 1887   | 1814    | 1794    | 0       | 96279   |
| WRLP443 | 8166    | 7958    | 8062    | 8134    | 8042    | 8177    | 8174    | 8303    | 8261    | 8421    | 7930    | 7133    | 1686   | 1269    | 0       | 1794    | 106660  |
| WRLP440 | 7905    | 7750    | 7810    | 7866    | 7775    | 7808    | 7840    | 7852    | 7846    | 7840    | 7624    | 6995    | 1454   | 0       | 1269    | 1814    | 111193  |
| WRLP422 | 8254    | 7864    | 8030    | 8137    | 7981    | 8145    | 8251    | 8343    | 8367    | 8390    | 7894    | 7088    | 0      | 1454    | 1686    | 1887    | 104032  |
| WRLP459 | 7839    | 7761    | 7794    | 7844    | 7669    | 7778    | 7902    | 8091    | 7987    | 8096    | 7665    | 0       | 7088   | 6995    | 7133    | 6778    | 105116  |
| WRLP512 | 952     | 970     | 993     | 903     | 863     | 820     | 777     | 752     | 682     | 682     | 0       | 7665    | 7894   | 7624    | 7930    | 7744    | 111283  |
| WRLP468 | 996     | 965     | 1113    | 783     | 783     | 816     | 585     | 374     | 353     | 0       | 682     | 8096    | 8390   | 7840    | 8421    | 8295    | 117385  |
| WRLP466 | 968     | 935     | 1077    | 836     | 800     | 785     | 597     | 368     | 0       | 353     | 682     | 7987    | 8367   | 7846    | 8261    | 8228    | 116570  |
| WRLP394 | 1003    | 874     | 1092    | 805     | 821     | 880     | 642     | 0       | 368     | 374     | 752     | 8091    | 8343   | 7852    | 8303    | 8233    | 115960  |
| WRLP469 | 906     | 868     | 1152    | 889     | 879     | 828     | 0       | 642     | 597     | 585     | 777     | 7902    | 8251   | 7840    | 8174    | 7927    | 112747  |
| WRLP520 | 1100    | 999     | 1061    | 970     | 892     | 0       | 828     | 880     | 785     | 816     | 820     | 7778    | 8145   | 7808    | 8177    | 7870    | 109988  |
| WRLP519 | 1097    | 1028    | 1064    | 930     | 0       | 892     | 879     | 821     | 800     | 783     | 863     | 7669    | 7981   | 7775    | 8042    | 7709    | 109550  |
| WRLP521 | 1006    | 1019    | 1005    | 0       | 930     | 970     | 889     | 805     | 836     | 783     | 903     | 7844    | 8137   | 7866    | 8134    | 7827    | 111697  |
| WRLP517 | 1236    | 1127    | 0       | 1005    | 1064    | 1061    | 1152    | 1092    | 1077    | 1113    | 993     | 7794    | 8030   | 7810    | 8062    | 7719    | 107981  |
| WRLP463 | 1141    | 0       | 1127    | 1019    | 1028    | 999     | 868     | 874     | 935     | 965     | 970     | 7761    | 7864   | 7750    | 7958    | 7645    | 108027  |
| WRLP455 | 0       | 1141    | 1236    | 1006    | 1097    | 1100    | 906     | 1003    | 968     | 996     | 952     | 7839    | 8254   | 7905    | 8166    | 7861    | 109953  |
| WRLP486 | 1413    | 1449    | 1591    | 1411    | 1436    | 1473    | 1279    | 1436    | 1420    | 1498    | 1345    | 7881    | 8083   | 7994    | 8080    | 7663    | 104942  |
| WRLP494 | 1553    | 1491    | 1458    | 1522    | 1424    | 1443    | 1454    | 1471    | 1551    | 1595    | 1290    | 7773    | 8147   | 8102    | 8142    | 7642    | 104966  |
| WRLP499 | 1683    | 1449    | 1735    | 1426    | 1431    | 1597    | 1583    | 1563    | 1678    | 1677    | 1568    | 7925    | 8163   | 8077    | 8181    | 7752    | 104997  |
| WRLP527 | 1876    | 1770    | 1774    | 1836    | 1814    | 1829    | 1727    | 1908    | 1898    | 1967    | 1660    | 7827    | 8196   | 8160    | 8338    | 7810    | 103748  |
| WRLP483 | 1865    | 1789    | 1966    | 1865    | 1772    | 1815    | 1737    | 1932    | 1951    | 2089    | 1775    | 7812    | 8077   | 8283    | 8287    | 7574    | 102165  |
| WRLP496 | 1934    | 1890    | 1928    | 2053    | 1954    | 1802    | 1875    | 2058    | 2207    | 2245    | 1844    | 7982    | 8135   | 8313    | 8255    | 7767    | 101520  |
| WRLP502 | 2704    | 2442    | 2434    | 2525    | 2542    | 2654    | 2737    | 2988    | 3017    | 3047    | 2590    | 8073    | 8342   | 8791    | 8615    | 7852    | 96604   |
| WRLP377 | 8769    | 8657    | 8780    | 8912    | 8728    | 8803    | 8920    | 9091    | 9228    | 9262    | 8633    | 7915    | 8342   | 8519    | 8494    | 7603    | 99582   |
| WRLP378 | 8463    | 8381    | 8355    | 8568    | 8389    | 8333    | 8547    | 8658    | 8711    | 8836    | 8428    | 7684    | 8115   | 8165    | 8130    | 7744    | 103657  |
| WRLP382 | 8545    | 8440    | 8639    | 8481    | 8351    | 8493    | 8419    | 8507    | 8570    | 8610    | 8277    | 8006    | 8346   | 8119    | 8262    | 8070    | 109351  |
| WRLP380 | 8323    | 8295    | 8400    | 8367    | 8089    | 8236    | 8378    | 8279    | 8531    | 8357    | 8120    | 7792    | 8109   | 7908    | 8206    | 7944    | 109084  |
| WRLP354 | 8418    | 8333    | 8556    | 8436    | 8260    | 8366    | 8354    | 8325    | 8454    | 8323    | 8117    | 8028    | 8454   | 7919    | 8319    | 8091    | 111832  |
| WRLP386 | 8884    | 8867    | 9077    | 8848    | 8679    | 8682    | 8759    | 8601    | 8650    | 8522    | 8584    | 8673    | 8927   | 8290    | 8906    | 9022    | 118728  |
| WRLP530 | 8290    | 8265    | 8369    | 8178    | 8185    | 8191    | 8088    | 8025    | 8039    | 8094    | 8034    | 7735    | 7905   | 7652    | 7976    | 7988    | 111952  |
| WRLP533 | 8769    | 8601    | 8753    | 8640    | 8637    | 8694    | 8664    | 8722    | 8818    | 8881    | 8547    | 7897    | 8190   | 8131    | 8215    | 8095    | 106991  |
| WRLP408 | 8563    | 8351    | 8546    | 8547    | 8392    | 8458    | 8367    | 8305    | 8386    | 8406    | 8309    | 8039    | 8426   | 7953    | 8303    | 8260    | 114209  |
| WRLP409 | 9308    | 9067    | 9052    | 9441    | 9237    | 9284    | 9393    | 9729    | 9825    | 9940    | 9310    | 8335    | 8573   | 9017    | 8677    | 8148    | 97887   |

| WRLP409 | WRLP408 | WRLP533 | WRLP530 | WRLP386 | WRLP354 | WRLP380 | WRLP382 | WRLP378 | WRLP377 | WRLP502 | WRLP496 | WRLP483 | WRLP527 | WRLP499 | WRLP494 | WRLP486 |
|---------|---------|---------|---------|---------|---------|---------|---------|---------|---------|---------|---------|---------|---------|---------|---------|---------|
| 96895   | 114848  | 107305  | 112586  | 120252  | 112713  | 109760  | 109864  | 103677  | 99160   | 95947   | 101427  | 101997  | 103565  | 105018  | 104952  | 105009  |
| 96903   | 114849  | 107330  | 112597  | 120244  | 112693  | 109740  | 109847  | 103672  | 99149   | 95964   | 101415  | 101982  | 103547  | 105008  | 104955  | 105039  |
| 96881   | 114807  | 107313  | 112558  | 120212  | 112658  | 109722  | 109829  | 103630  | 99140   | 95937   | 101401  | 101972  | 103532  | 104984  | 104929  | 104978  |
| 96833   | 114766  | 107229  | 112525  | 120173  | 112629  | 109685  | 109763  | 103574  | 99074   | 95898   | 101332  | 101907  | 103468  | 104937  | 104878  | 104936  |
| 96954   | 114920  | 107397  | 112656  | 120331  | 112772  | 109817  | 109921  | 103730  | 99217   | 96040   | 101483  | 102067  | 103633  | 105076  | 105011  | 105091  |
| 96859   | 114820  | 107285  | 112551  | 120236  | 112678  | 109733  | 109814  | 103630  | 99129   | 95919   | 101394  | 101963  | 103539  | 104987  | 104917  | 105005  |
| 96850   | 114819  | 107284  | 112537  | 120216  | 112662  | 109723  | 109808  | 103634  | 99154   | 95953   | 101384  | 101948  | 103512  | 104974  | 104924  | 104978  |
| 96950   | 114918  | 107378  | 112645  | 120324  | 112775  | 109835  | 109919  | 103732  | 99239   | 96029   | 101516  | 102073  | 103623  | 105085  | 105018  | 105089  |
| 95724   | 111903  | 104846  | 109612  | 116541  | 109465  | 107008  | 107178  | 101437  | 97624   | 94714   | 99581   | 100031  | 101689  | 102709  | 102747  | 102837  |
| 96761   | 112900  | 105892  | 110717  | 117471  | 110522  | 108047  | 108146  | 102413  | 98634   | 95635   | 100610  | 101098  | 102717  | 103723  | 103749  | 103807  |
| 98815   | 115063  | 107972  | 112756  | 119696  | 112628  | 110073  | 110239  | 104469  | 100659  | 97737   | 102668  | 103132  | 104750  | 105828  | 105774  | 105882  |
| 95670   | 111990  | 104930  | 109811  | 116704  | 109712  | 106990  | 107171  | 101389  | 97461   | 94667   | 99612   | 100316  | 101780  | 103043  | 102826  | 102934  |
| 95946   | 112195  | 105218  | 110023  | 116949  | 109900  | 107228  | 107373  | 101570  | 97621   | 94872   | 99725   | 100444  | 101940  | 103315  | 102984  | 103059  |
| 96041   | 112366  | 105184  | 110095  | 116993  | 110050  | 107405  | 107661  | 101872  | 97878   | 94865   | 99660   | 100302  | 101885  | 103237  | 103164  | 103208  |
| 97887   | 114209  | 106991  | 111952  | 118728  | 111832  | 109084  | 109351  | 103657  | 99582   | 96604   | 101520  | 102165  | 103748  | 104997  | 104966  | 104942  |
| 8148    | 8260    | 8095    | 7988    | 9022    | 8091    | 7944    | 8070    | 7744    | 7603    | 7852    | 7767    | 7574    | 7810    | 7752    | 7642    | 7663    |
| 8677    | 8303    | 8215    | 7976    | 8906    | 8319    | 8206    | 8262    | 8130    | 8494    | 8615    | 8255    | 8287    | 8338    | 8181    | 8142    | 8080    |
| 9017    | 7953    | 8131    | 7652    | 8290    | 7919    | 7908    | 8119    | 8165    | 8519    | 8791    | 8313    | 8283    | 8160    | 8077    | 8102    | 7994    |
| 8573    | 8426    | 8190    | 7905    | 8927    | 8454    | 8109    | 8346    | 8115    | 8342    | 8342    | 8135    | 8077    | 8196    | 8163    | 8147    | 8083    |
| 8335    | 8039    | 7897    | 7735    | 8673    | 8028    | 7792    | 8006    | 7684    | 7915    | 8073    | 7982    | 7812    | 7827    | 7925    | 7773    | 7881    |
| 9310    | 8309    | 8547    | 8034    | 8584    | 8117    | 8120    | 8277    | 8428    | 8633    | 2590    | 1844    | 1775    | 1660    | 1568    | 1290    | 1345    |
| 9540    | 8406    | 8881    | 8094    | 8522    | 8323    | 8357    | 8610    | 8836    | 9262    | 3047    | 2245    | 2089    | 1967    | 1677    | 1595    | 1498    |
| 9825    | 8386    | 8818    | 8039    | 8650    | 8454    | 8531    | 8570    | 8711    | 9228    | 3017    | 2207    | 1951    | 1898    | 1678    | 1551    | 1420    |
| 9729    | 8305    | 8722    | 8025    | 8601    | 8325    | 8279    | 8507    | 8658    | 9091    | 2988    | 2058    | 1932    | 1908    | 1563    | 1471    | 1436    |
| 9393    | 8367    | 8664    | 8088    | 8759    | 8354    | 8378    | 8419    | 8547    | 8920    | 2737    | 1875    | 1737    | 1727    | 1583    | 1454    | 1279    |
| 9284    | 8458    | 8694    | 8191    | 8682    | 8366    | 8236    | 8493    | 8333    | 8803    | 2654    | 1802    | 1815    | 1829    | 1597    | 1443    | 1473    |
| 9237    | 8392    | 8637    | 8185    | 8679    | 8260    | 8089    | 8351    | 8389    | 8728    | 2542    | 1954    | 1772    | 1814    | 1431    | 1424    | 1436    |
| 9441    | 8547    | 8640    | 8178    | 8848    | 8436    | 8367    | 8481    | 8568    | 8912    | 2525    | 2053    | 1865    | 1836    | 1426    | 1522    | 1411    |
| 9052    | 8546    | 8753    | 8369    | 9077    | 8556    | 8400    | 8639    | 8355    | 8780    | 2434    | 1928    | 1966    | 1774    | 1735    | 1458    | 1591    |
| 9067    | 8351    | 8601    | 8265    | 8867    | 8333    | 8295    | 8440    | 8381    | 8657    | 2442    | 1890    | 1789    | 1770    | 1449    | 1491    | 1449    |
| 9308    | 8563    | 8769    | 8290    | 8884    | 8418    | 8323    | 8545    | 8463    | 8769    | 2704    | 1934    | 1865    | 1876    | 1683    | 1553    | 1413    |
| 9003    | 8667    | 8663    | 8556    | 9246    | 8581    | 8525    | 8429    | 8228    | 8503    | 2450    | 2048    | 1930    | 1831    | 1822    | 1701    | 0       |
| 8853    | 8627    | 8700    | 8452    | 9363    | 8602    | 8391    | 8544    | 8407    | 8512    | 2444    | 1896    | 1974    | 1827    | 1766    | 0       | 1701    |
| 9050    | 8806    | 8792    | 8565    | 9303    | 8654    | 8532    | 8575    | 8460    | 8619    | 2639    | 2102    | 2035    | 1885    | 0       | 1766    | 1822    |
| 8907    | 8943    | 8749    | 8764    | 9696    | 8887    | 8678    | 8749    | 8483    | 8618    | 2602    | 2031    | 1954    | 0       | 1885    | 1827    | 1831    |
| 8784    | 8971    | 8790    | 8721    | 9628    | 8867    | 8750    | 8654    | 8492    | 8600    | 2267    | 2179    | 0       | 1954    | 2035    | 1974    | 1930    |
| 8805    | 9002    | 8900    | 8791    | 9866    | 8954    | 8841    | 8871    | 8515    | 8629    | 2396    | 0       | 2179    | 2031    | 2102    | 1896    | 2048    |
| 8956    | 9570    | 9292    | 9319    | 10424   | 9472    | 9177    | 9458    | 8939    | 8713    | 0       | 2396    | 2267    | 2602    | 2639    | 2444    | 2450    |
| 8619    | 8946    | 8456    | 8407    | 2818    | 2401    | 2196    | 2069    | 2041    | 0       | 8713    | 8629    | 8600    | 8618    | 8619    | 8512    | 8503    |
| 8688    | 8621    | 8416    | 8313    | 2153    | 1812    | 1800    | 1582    | 0       | 2041    | 8939    | 8515    | 8492    | 8483    | 8460    | 8407    | 8228    |
| 9205    | 8252    | 8303    | 7994    | 1454    | 1454    | 1424    | 0       | 1582    | 2069    | 9458    | 8871    | 8654    | 8749    | 8575    | 8544    | 8429    |
| 9259    | 8253    | 8315    | 7806    | 1208    | 947     | 0       | 1424    | 1800    | 2196    | 9177    | 8841    | 8750    | 8678    | 8532    | 8391    | 8525    |
| 9452    | 8222    | 8428    | 7786    | 876     | 0       | 947     | 1454    | 1812    | 2401    | 9472    | 8954    | 8867    | 8887    | 8654    | 8602    | 8581    |
| 10302   | 8442    | 8896    | 8038    | 0       | 876     | 1208    | 1454    | 2153    | 2818    | 10424   | 9866    | 9628    | 9696    | 9303    | 9363    | 9246    |
| 8983    | 7652    | 1069    | 0       | 8038    | 7786    | 7806    | 7994    | 8313    | 8407    | 9319    | 8791    | 8721    | 8764    | 8565    | 8452    | 8556    |
| 8695    | 8348    | 0       | 1069    | 8896    | 8428    | 8315    | 8303    | 8416    | 8456    | 9292    | 8900    | 8790    | 8749    | 8792    | 8700    | 8663    |
| 2695    | 0       | 8348    | 7652    | 8442    | 8222    | 8253    | 8252    | 8621    | 8946    | 9570    | 9002    | 8971    | 8943    | 8806    | 8627    | 8667    |
| 0       | 2695    | 8695    | 8983    | 10302   | 9452    | 9259    | 9205    | 8688    | 8619    | 8956    | 8805    | 8784    | 8907    | 9050    | 8853    | 9003    |
